# Supplementary material for: An extremely tough and ionic conductive natural-polymer-based double network hydrogel
Source: Royal Society of Chemistry journal article supplement (doi:10.1039/d1tb01458g), 2021-01-01
Supplement: d1tb01458g1.pdf [file d1tb01458g1.pdf]

## Supporting Information

### Extremely Tough and Ionic Conductive Natural-polymer-Based Double Network Hydrogel

Xingyue Sun<sup>a</sup>, Yongzhi Liang<sup>a</sup>, Lina Ye<sup>b,\*</sup>, Haiyi Liang<sup>a,c,\*</sup>

<sup>a</sup> CAS Key Laboratory of Mechanical Behavior and Design of Materials, University of Science and Technology of China, Hefei, Anhui 230026, China

<sup>b</sup> College of Chemical engineering, Anhui University, Hefei, Anhui 230601, China

<sup>c</sup> IAT-Chungu Joint Laboratory for Additive Manufacturing, Anhui Chungu 3D printing Institute of Intelligent Equipment and Industrial Technology, Wuhu, Anhui 241200, China

\* Corresponding Author

**Keywords:** tough hydrogels, natural polymer, ionic conductive

## Supplementary Tables

| Gelatin<br>(wt%) | Gellan<br>gum<br>(wt%) | SO <sub>4</sub> <sup>2-</sup><br>(M) | Na <sup>+</sup><br>(M) | Elongation | Tensile<br>Strength<br>(MPa) | Elastic<br>Modulus<br>(MPa) | Fracture<br>Energy<br>(kJ/m <sup>2</sup> ) | Water<br>Content<br>(%) |
|------------------|------------------------|--------------------------------------|------------------------|------------|------------------------------|-----------------------------|--------------------------------------------|-------------------------|
| 9                | 1                      | 0                                    | 0                      | 1.4        | 0.05                         | 0.08                        | 0.07                                       | 90                      |
| 10               | 0                      | 2.5                                  | 0                      | 7.1        | 2.1                          | 1.8                         | 6.2                                        | 57                      |
| 9.5              | 0.5                    | 2.5                                  | 0                      | 5.1        | 2.3                          | 2.0                         | 5.9                                        | 60                      |
| 9                | 1                      | 2.5                                  | 0                      | 3.8        | 1.9                          | 2.0                         | 7.8                                        | 61                      |
| 8                | 2                      | 2.5                                  | 0                      | 2.9        | 2.0                          | 2.0                         | 6.0                                        | 66                      |
| 7                | 3                      | 2.5                                  | 0                      | 2.0        | 1.9                          | 2.0                         | 4.7                                        | 67                      |
| 7.2              | 0.8                    | 2.5                                  | 0                      | 3.7        | 1.6                          | 1.2                         | 5.6                                        | 66                      |
| 10.8             | 1.2                    | 2.5                                  | 0                      | 3.9        | 2.4                          | 1.9                         | 10.2                                       | 61                      |
| 13.5             | 1.5                    | 2.5                                  | 0                      | 3.7        | 2.7                          | 2.0                         | 12.2                                       | 60                      |
| 9                | 1                      | 1.9                                  | 0                      | 3.8        | 1.4                          | 0.4                         | 5.2                                        | 68                      |
| 9                | 1                      | 3.2                                  | 0                      | 3.9        | 2.7                          | 2.9                         | 9.6                                        | 57                      |
| 9                | 1                      | 4.1                                  | 0                      | 2.8        | 4.3                          | 9.7                         | 9.6                                        | 50                      |
| 9                | 1                      | 3.2                                  | 1                      | 3.8        | 3.9                          | 6.8                         | 6.2                                        | 58                      |
| 9                | 1                      | 3.2                                  | 2                      | 2.9        | 4.4                          | 10.3                        | 11.8                                       | 55                      |
| 9                | 1                      | 3.2                                  | 3                      | 2.7        | 5.5                          | 15.9                        | 23.2                                       | 54                      |
| 9                | 1                      | 3.2                                  | 4                      | 2.1        | 7.5                          | 42.6                        | 27.7                                       | 49                      |

**Table S1.** Mechanical properties and water content of DN-Sul<sub>m</sub>-Na<sub>n</sub> hydrogel.

## Supplementary Figures

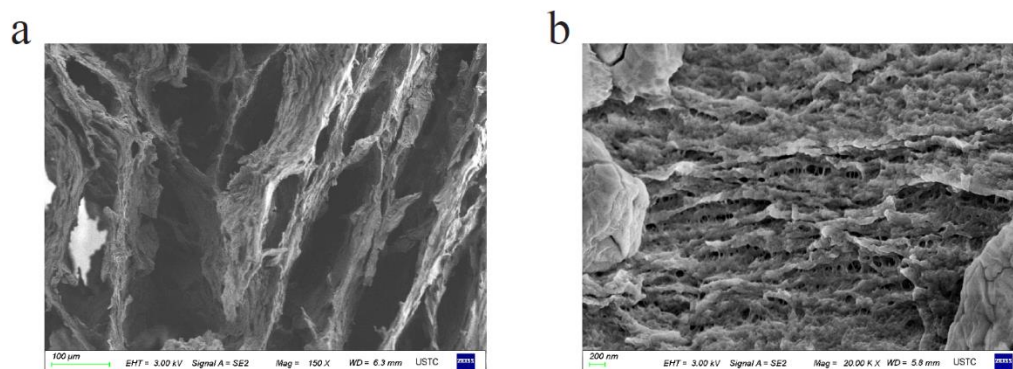

**Fig. S1** SEM images of a) DN hydrogel, and b) DN-Sul-Na hydrogel.

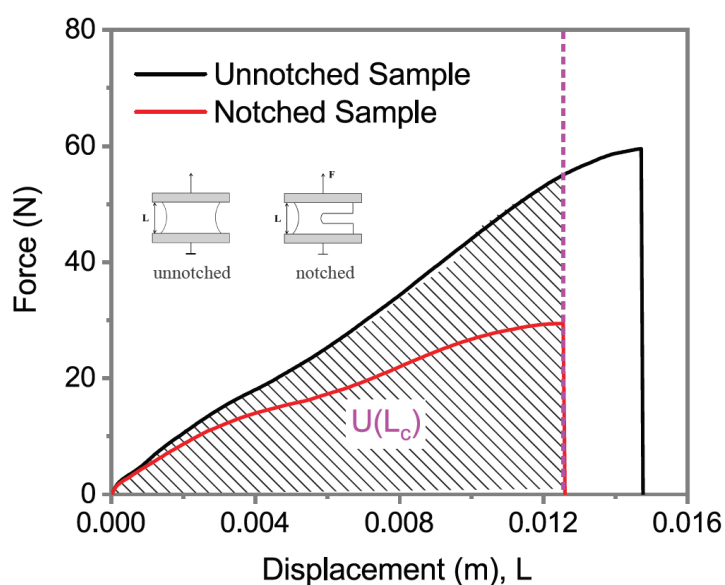

**Fig. S2** The force-displacement curve of the unnotched and notched DN-Sul-Na hydrogel.

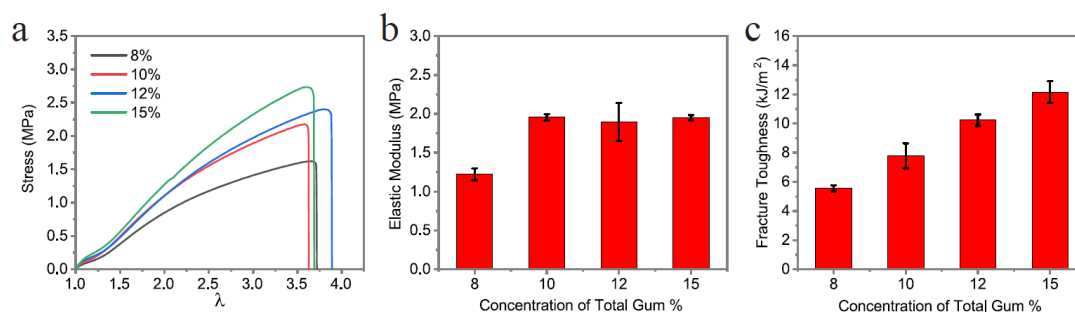

**Fig. S3** a) Tensile curves, b) elastic modulus, and c) fracture toughness of DN-Sul<sub>2.5</sub> hydrogel with different concentration of total gum.

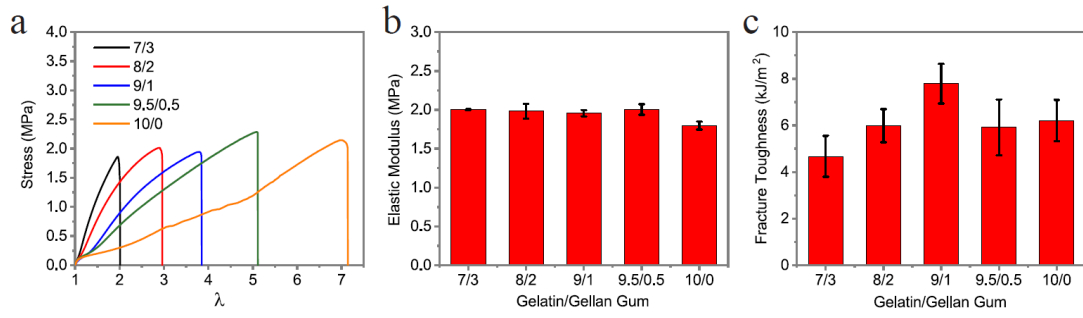

**Fig. S4** a) Tensile curves, b) elastic modulus, and c) fracture toughness of DN-Sul<sub>2.5</sub> hydrogel with different mass ratio of gelatin/gellan gum.

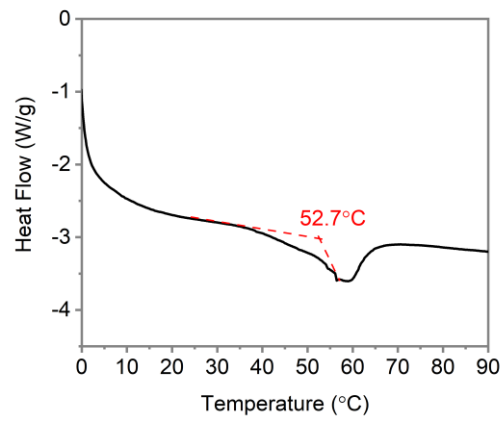

**Fig. S5** DSC curve of DN-Sul-Na gel.

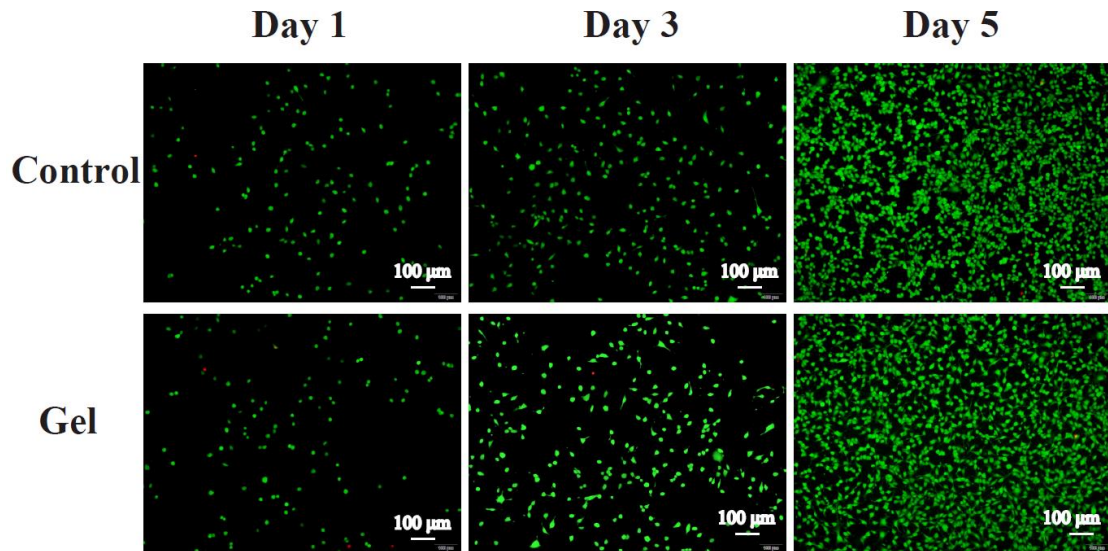

**Fig. S6** Merge images of the live/dead cells after culturing with DN-Sul-Na gel. Cells cultured with DMEM were used as the control

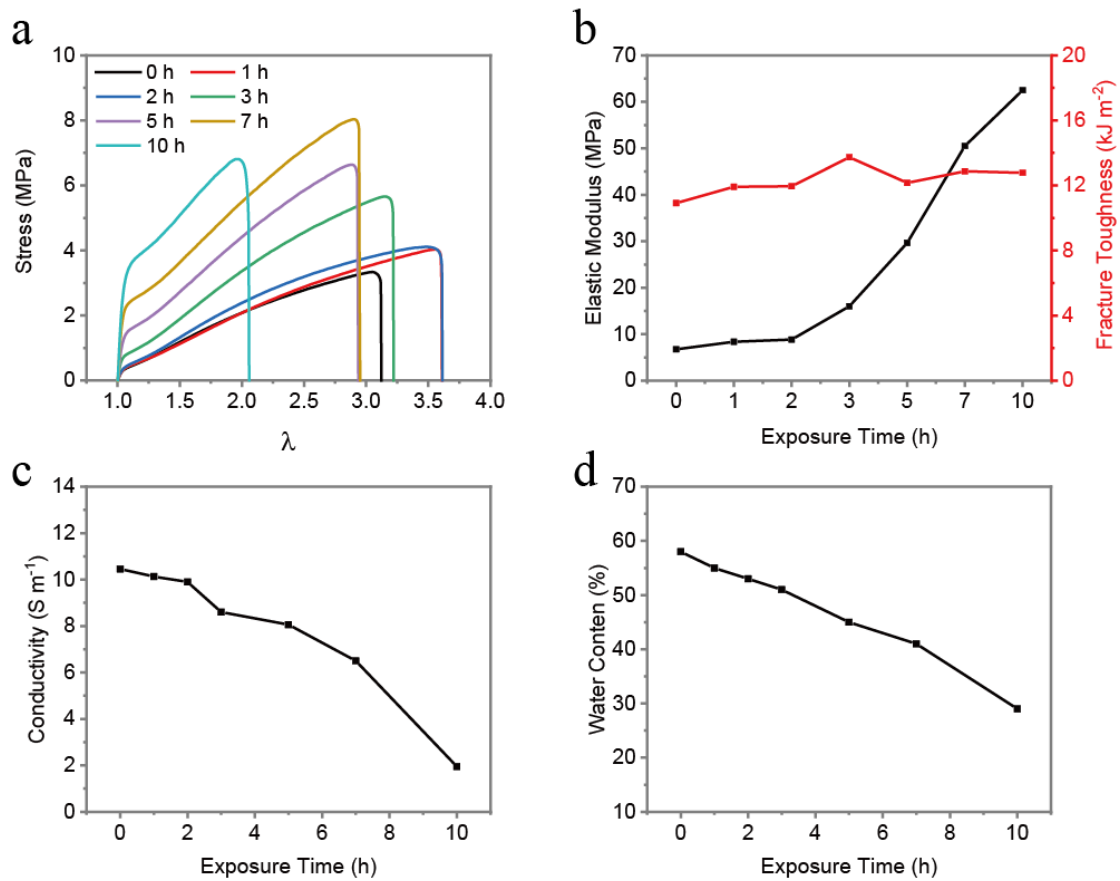

**Fig. S7** a) Tensile curves, b) elastic modulus and fracture toughness, c) conductivity and d) water content of DN-Sul3.2-Na1 gel exposed in air for 1h, 2h, 3h, 5h, 7h and 10h.

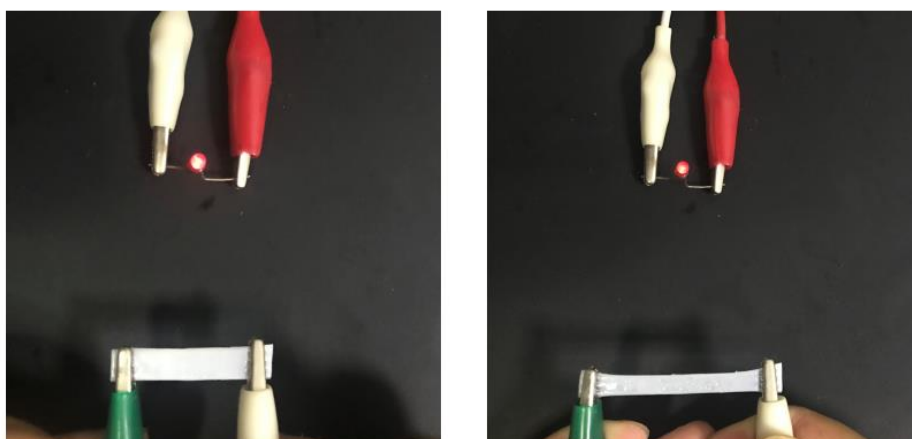

**Fig. S8** Photograph of hydrogel used as electrical wire.
